# Supplementary material
Source: publisher figshare collection journal article supplement (https://gsajournals.figshare.com/ndownloader/files/13390355)
Supplement: Supplementary file 1 [file 13390355]

**Figure S3.** No detectable anti-sNPFp immunoreactivity in the cell bodies of either the MB α/βs or α/βp subtypes. Scale bars represent 20μm. Expression patterns of the split-GAL4 lines were reported by *P{10XUAS-IVS-GFP-p10}attP2*.
